# Supplementary material
Source: PubMed Central journal article supplement (PMC7541691)
Supplement: NIHMS1622824-supplement-2.pdf [file NIHMS1622824-supplement-2.pdf]

## Supplementary Online Material (SOM):

Biomechanics of the mandible of *Macaca mulatta* during the power stroke of mastication:  
Loading, deformation, and strain regimes and the impact of food type

Olga Panagiotopoulou<sup>a,\*</sup>, Jose Iriarte-Diaz<sup>b</sup>, Hyab Mehari Abraha<sup>c</sup>, Andrea B. Taylor<sup>d</sup>, Simon Wilshin<sup>e</sup>, Paul C. Dechow<sup>f</sup>, Callum F. Ross<sup>g,\*</sup>

<sup>a</sup> *Department of Anatomy & Developmental Biology, Monash Biomedicine Discovery Institute, Faculty of Medicine Nursing and Health Sciences, Monash University, Clayton, Melbourne, Victoria 3800, Australia*

<sup>b</sup> *Department of Biology, University of the South, Sewanee TN 37383 USA*

<sup>c</sup> *Department of Basic Science, Touro University, California, USA*

<sup>d</sup> *Comparative Biomedical Sciences, The Royal Veterinary College, Hawkshead Lane, Herts, AL97TA, UK*

<sup>e</sup> *Department of Biomedical Sciences, Texas A&M University College of Dentistry, Dallas, Texas, USA*

<sup>f</sup> *Department of Organismal Biology and Anatomy, University of Chicago, Chicago, IL 60637 USA*

\*Corresponding authors.

*E-mail addresses:* [olga.panagiotopoulou@monash.edu](mailto:olga.panagiotopoulou@monash.edu) (O. Panagiotopoulou);

[rossc@uchicago.edu](mailto:rossc@uchicago.edu) (C.F. Ross).

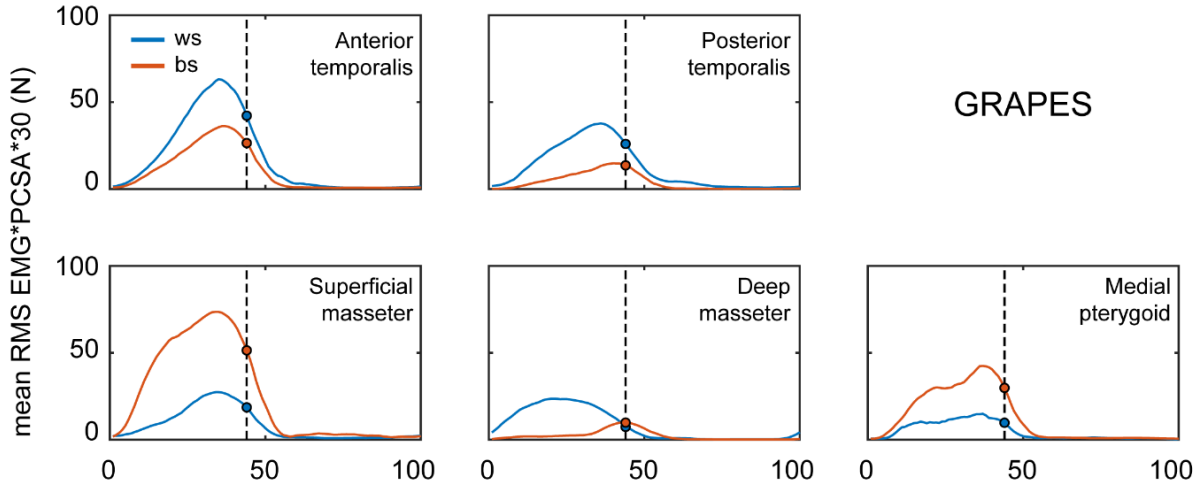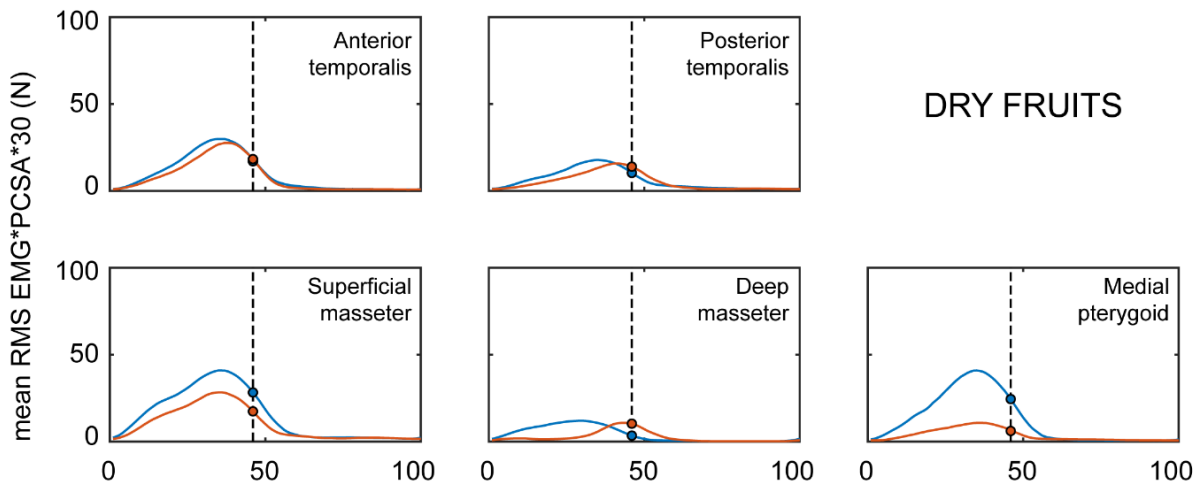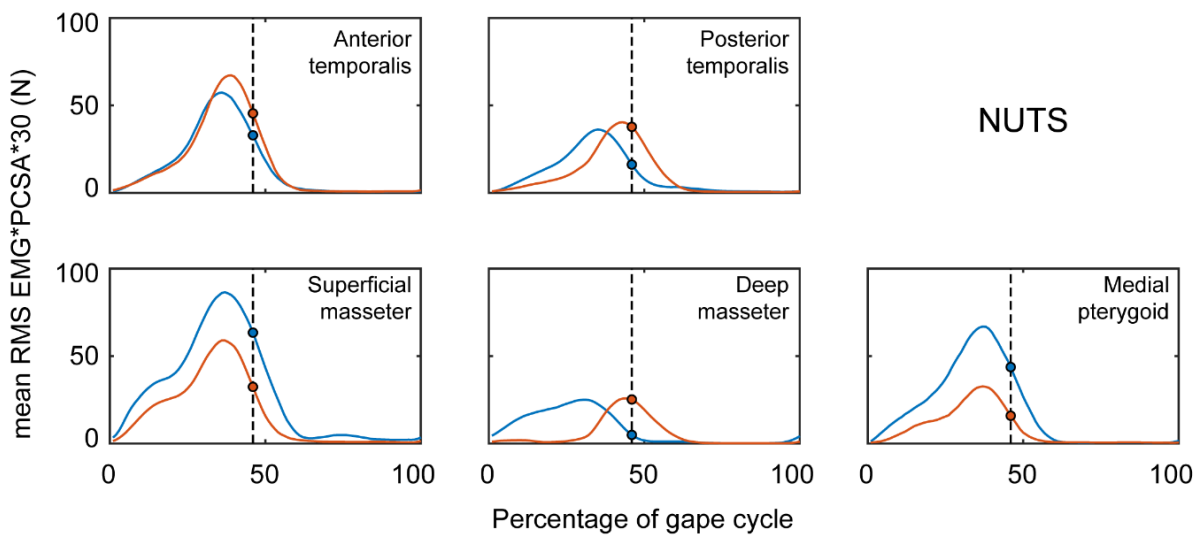

**SOM Figure S1.** Electromyographic (EMG) data from masticatory muscles when the animal was chewing on grapes, dried fruits, and nuts, throughout a standardized gape cycle, from maximum gape to the next maximum gape. Red lines indicate the mean root mean square (RMS) EMG multiplied by the muscle's physiological cross-sectional area PCSA and by  $30 \text{ kN/m}^2$ , for both working and balancing-side (blue and orange lines, respectively). The dashed vertical line indicates the timing of maximum strain in the lower lateral gauge (see Panagiotopoulou et al., 2017).

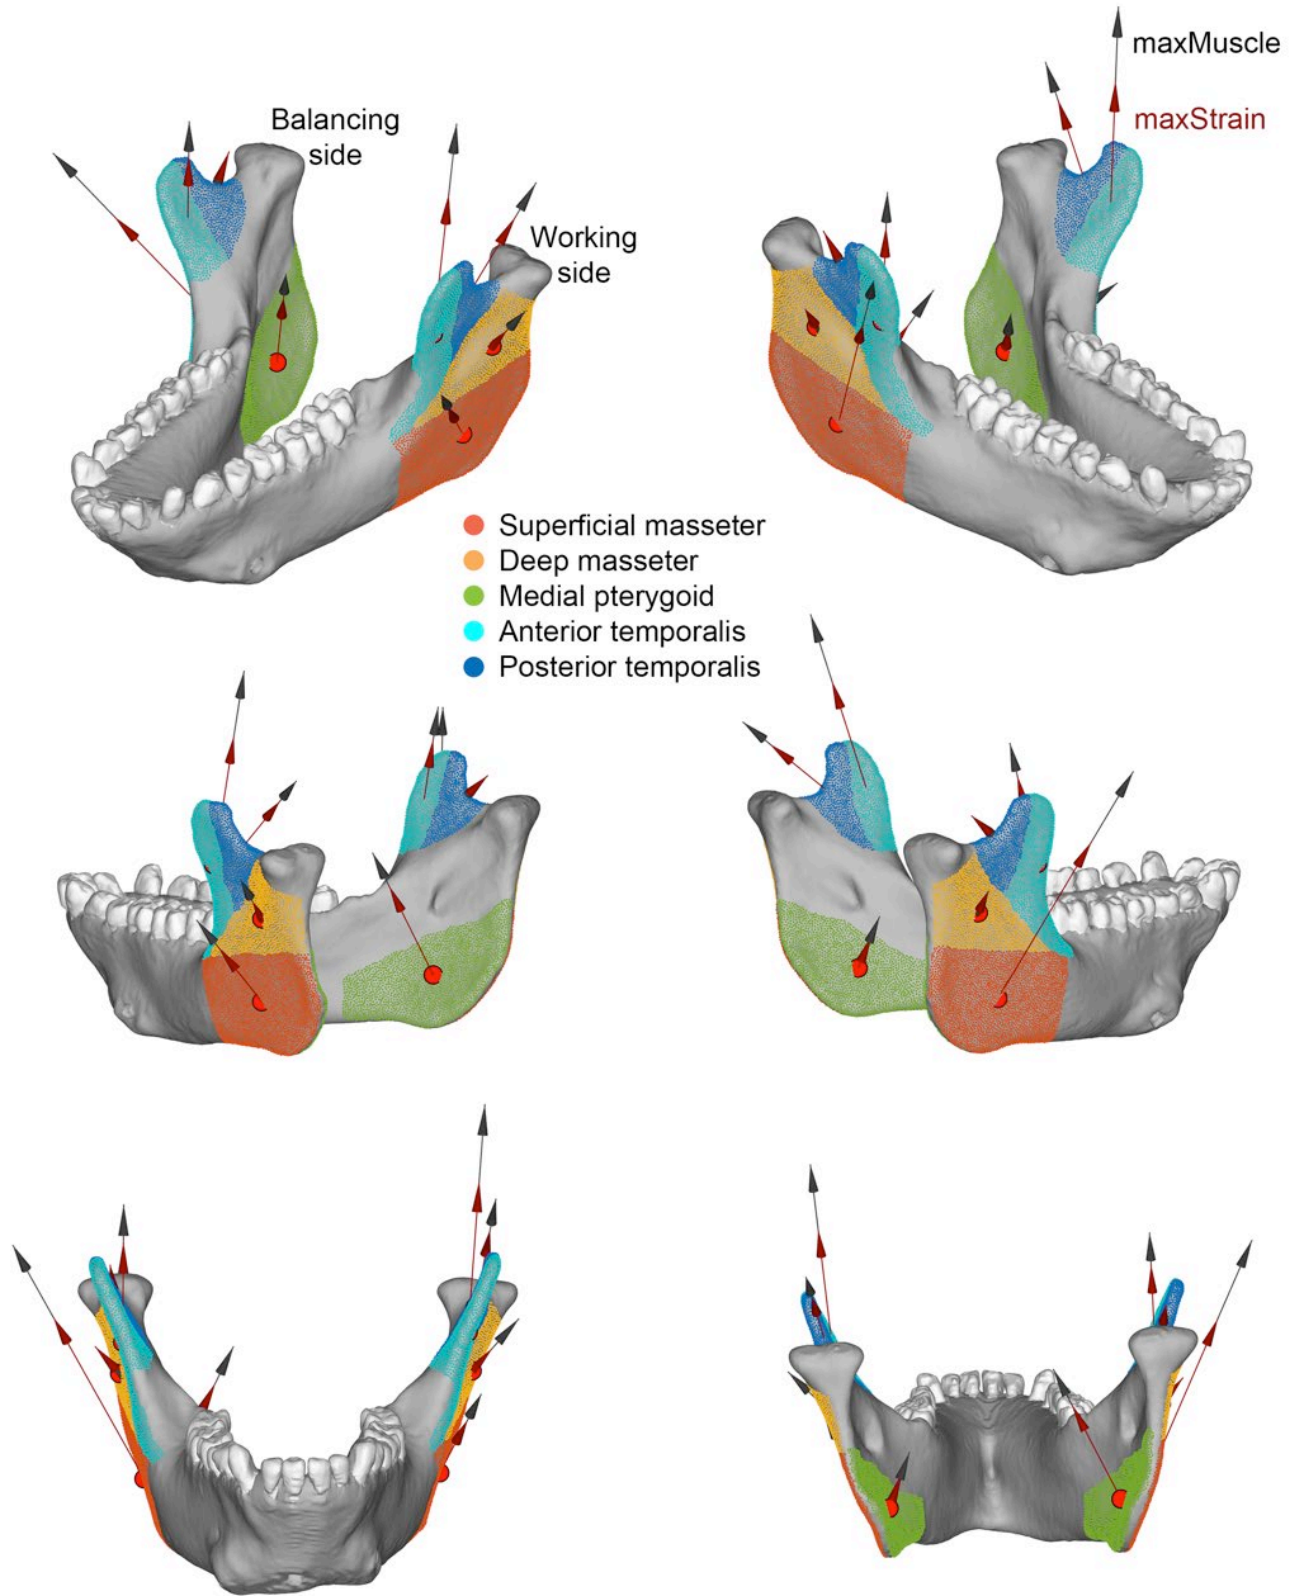

**SOM Figure S2.** Diagram illustrating the attachment areas and force vectors of the modeled muscles. Red circle indicates the centroid of each muscle and the black and red arrows indicate the direction of the individual muscle forces at the timing of maximum bone strain (maxStrain; the data used in this study) or maximum muscle force (maxMuscle). Arrow lengths are proportional to muscle force magnitudes.

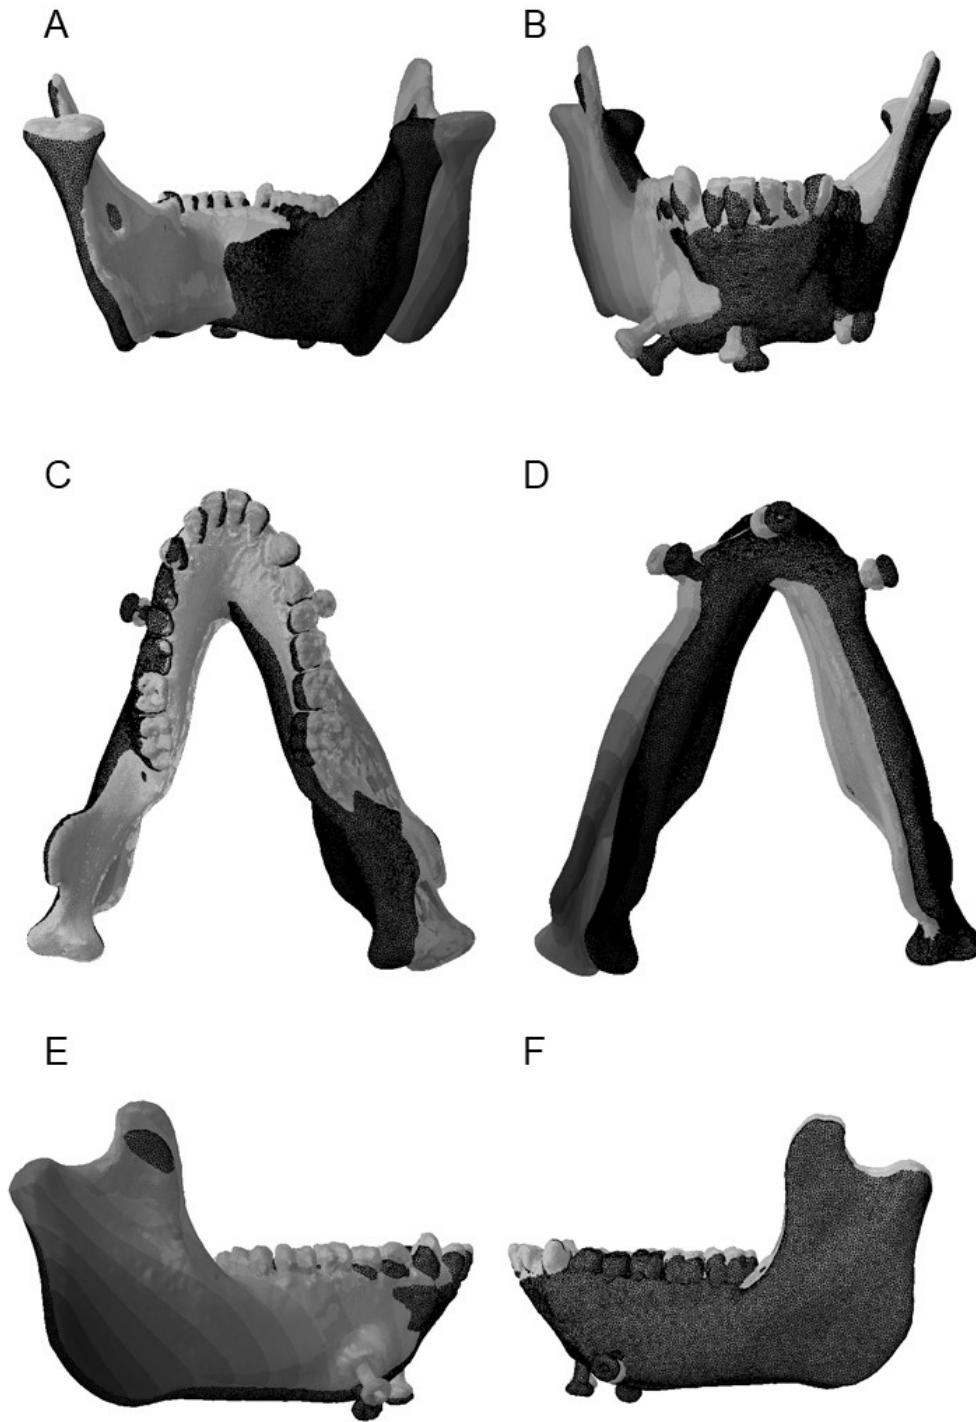

**SOM Figure S3.** Deformation regime in the mandible in six axial views. Deformation regime during simulated nut chewing. Deformation scale factor = 70. See SOM File S1 for animation.

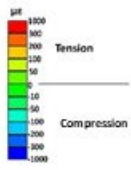

XX  
 superoinferior

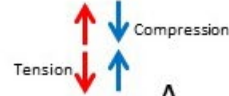

ZZ  
 mediolateral

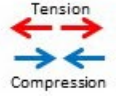

YY  
 anteroposterior

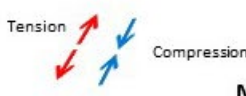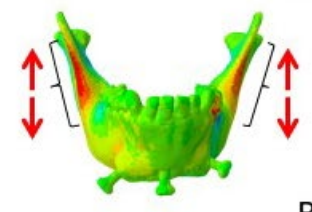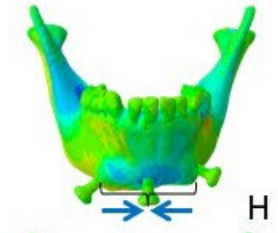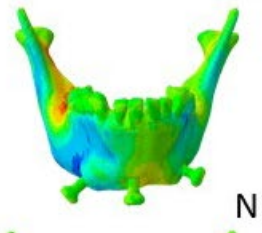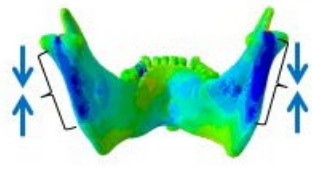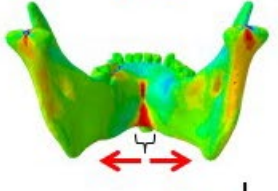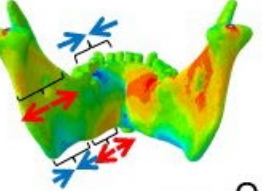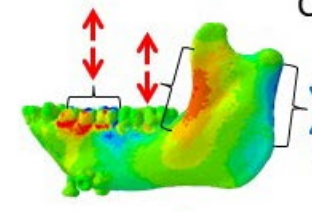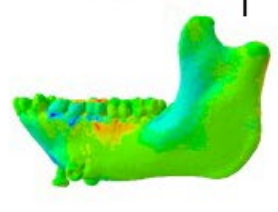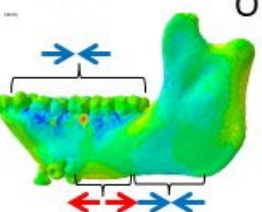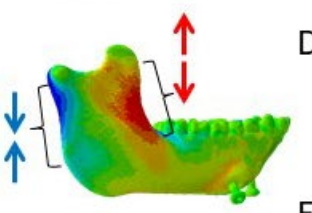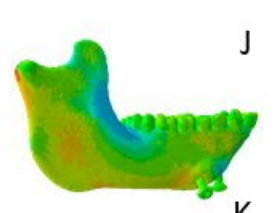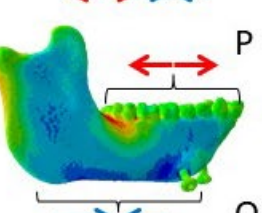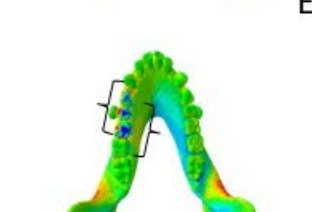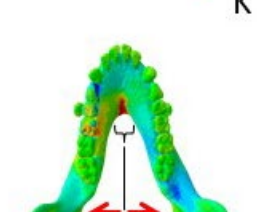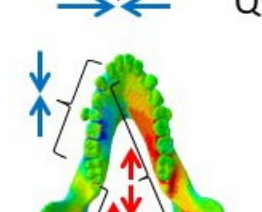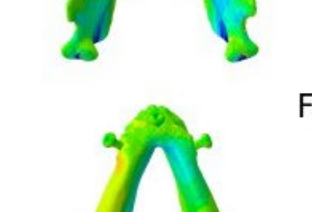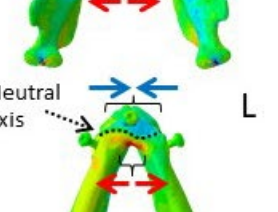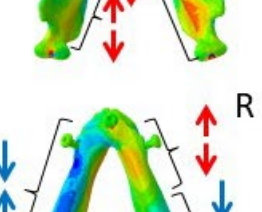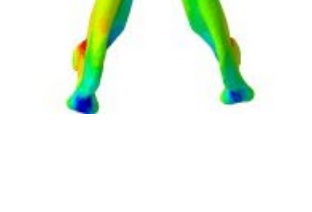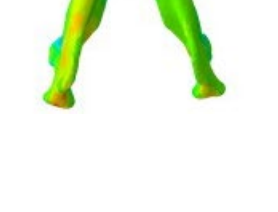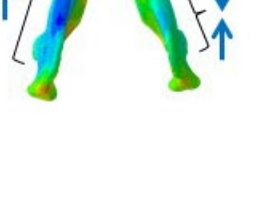

**SOM Figure S4.** Axial strain regimes in the FEM during simulated nut chewing. Scale is in microstrain, warm colours indicate positive strain (increase in relative length), cool colors indicate compressive strain (decrease in relative length). A–F) XX (superoinferior) axial strains. G–L) ZZ (medial-lateral) axial strains. M–R) YY (anteroposterior) axial strains. Converging blue arrows and diverging red arrows highlight areas of compressive and tensile strains, respectively, as indicated by the parentheses.



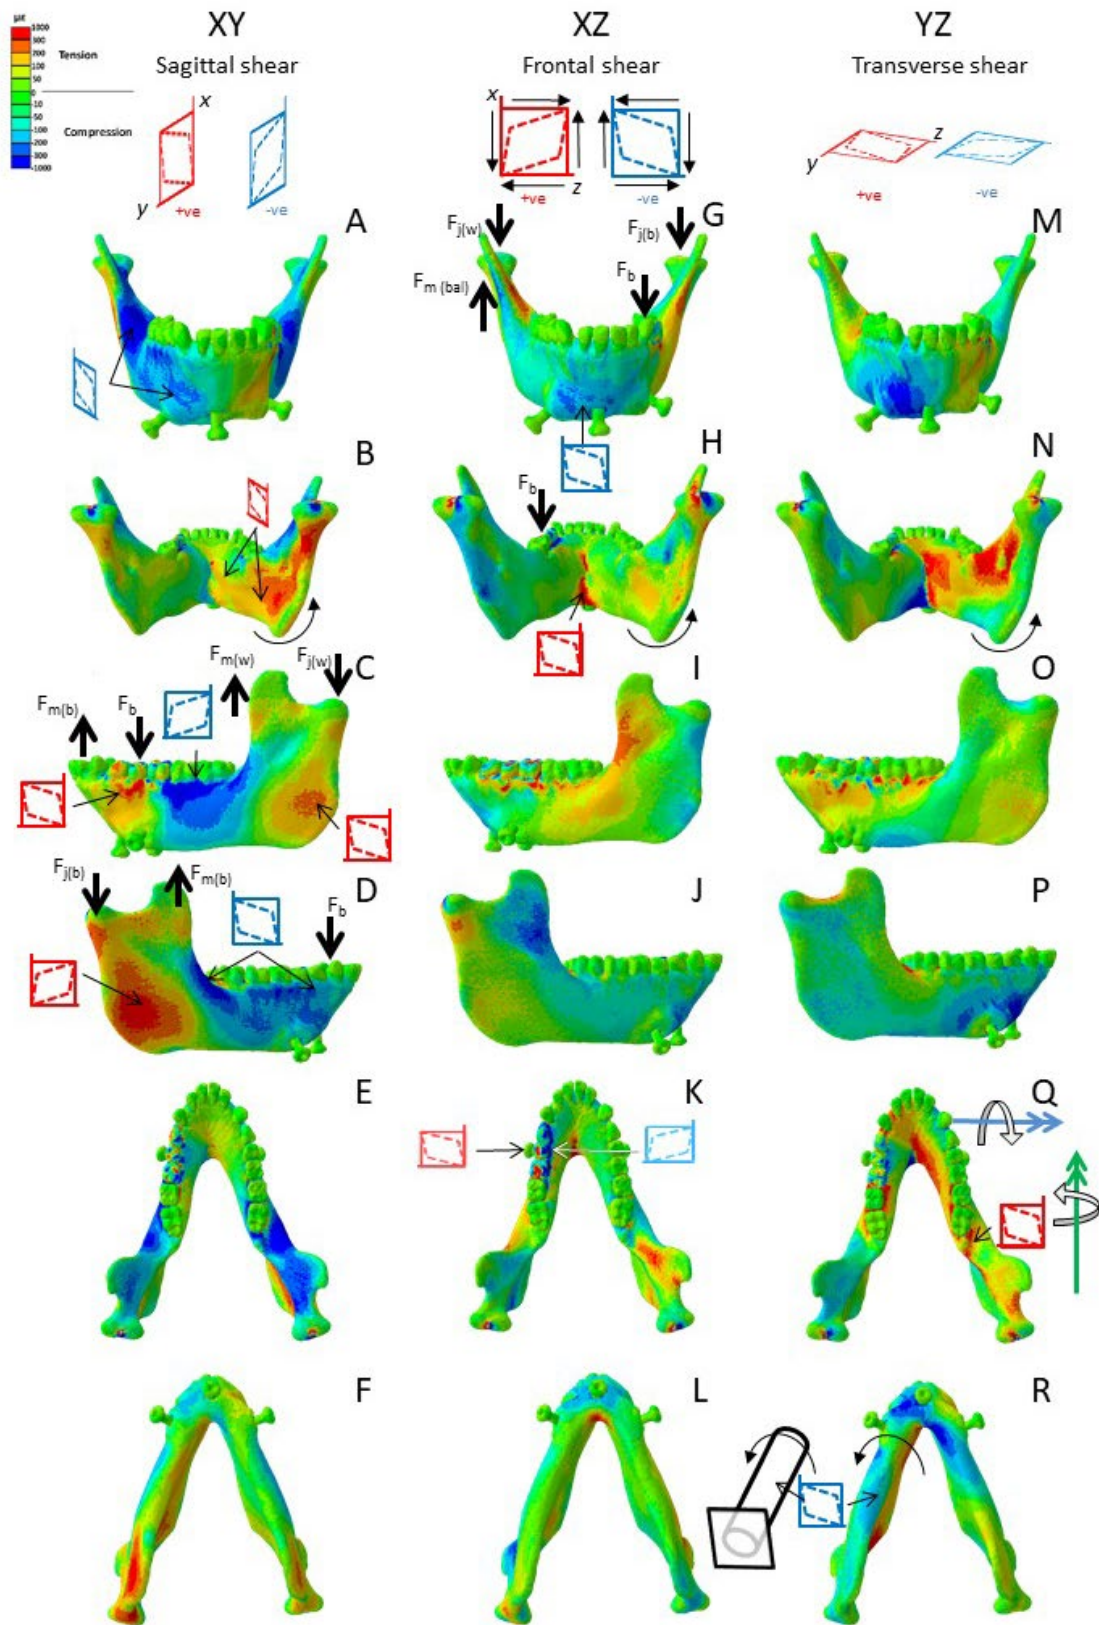

**SOM Figure S5.** Shear strain regimes in the FEM during simulated nut chewing. A–F) XY (sagittal) shear strains. G–L) XZ (frontal or coronal). M–R) YZ (transverse) planes. Shear strain definitions in top row are shown relative to models in anterior view; i.e., A, G, H. See also Figure 1.

Soft Food

Dry Fruit

Nuts

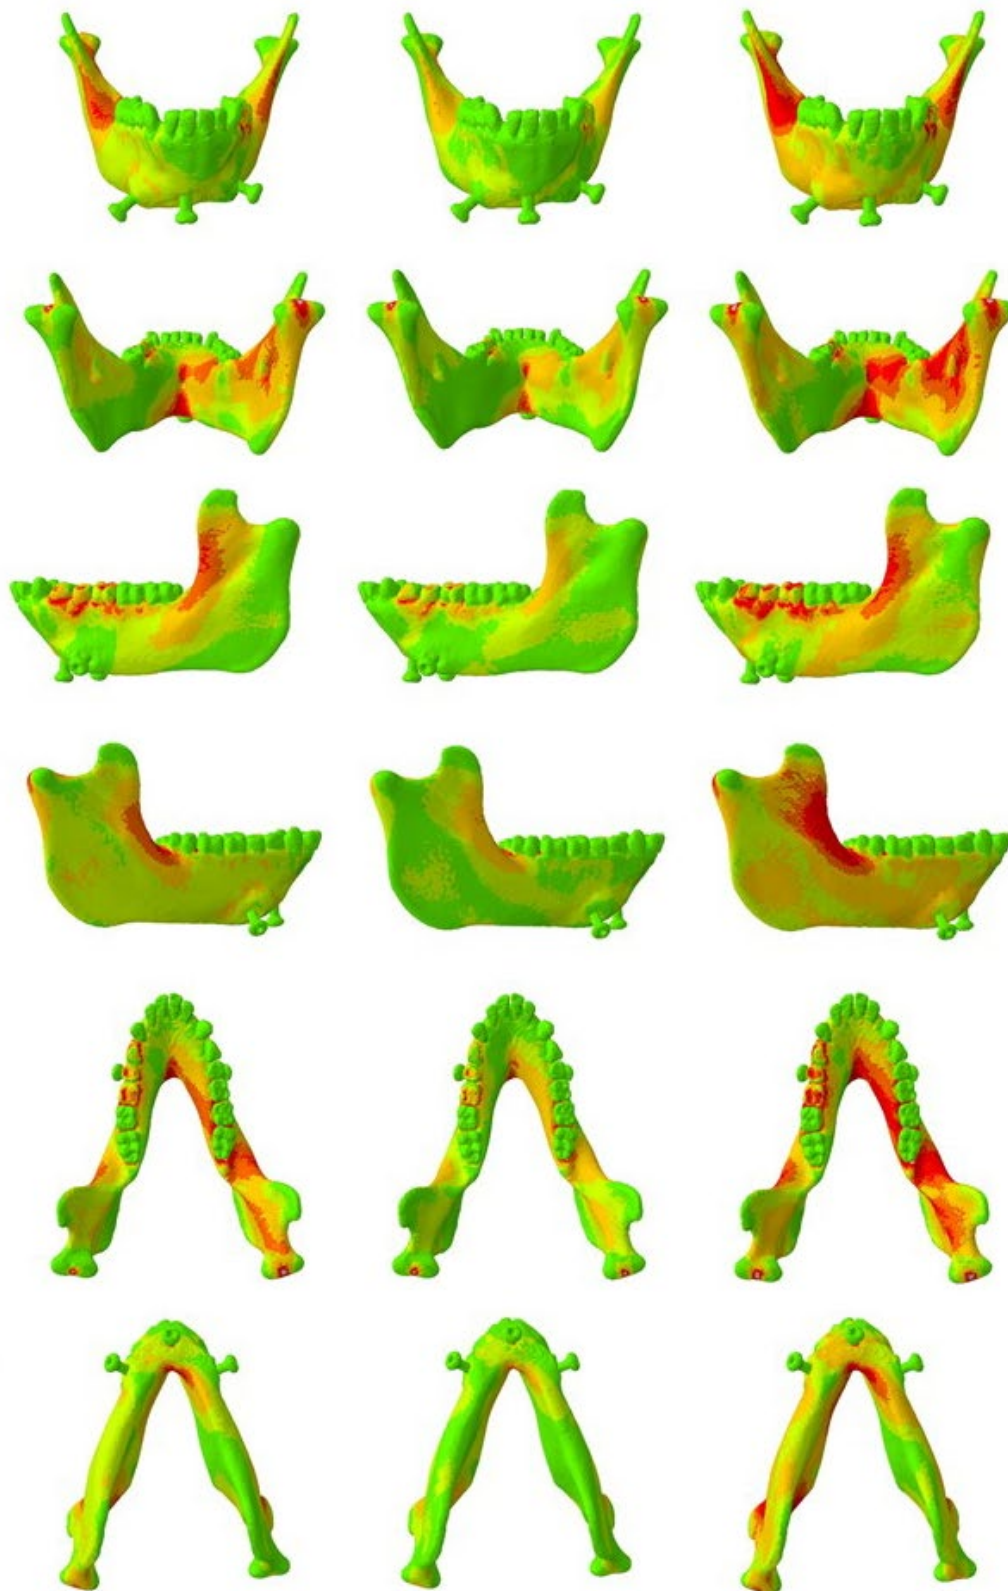

**SOM Figure S6.**  $\epsilon_1$  strain regimes in the finite element model during simulated nut chewing.

Soft Food

Dry Fruit

Nuts

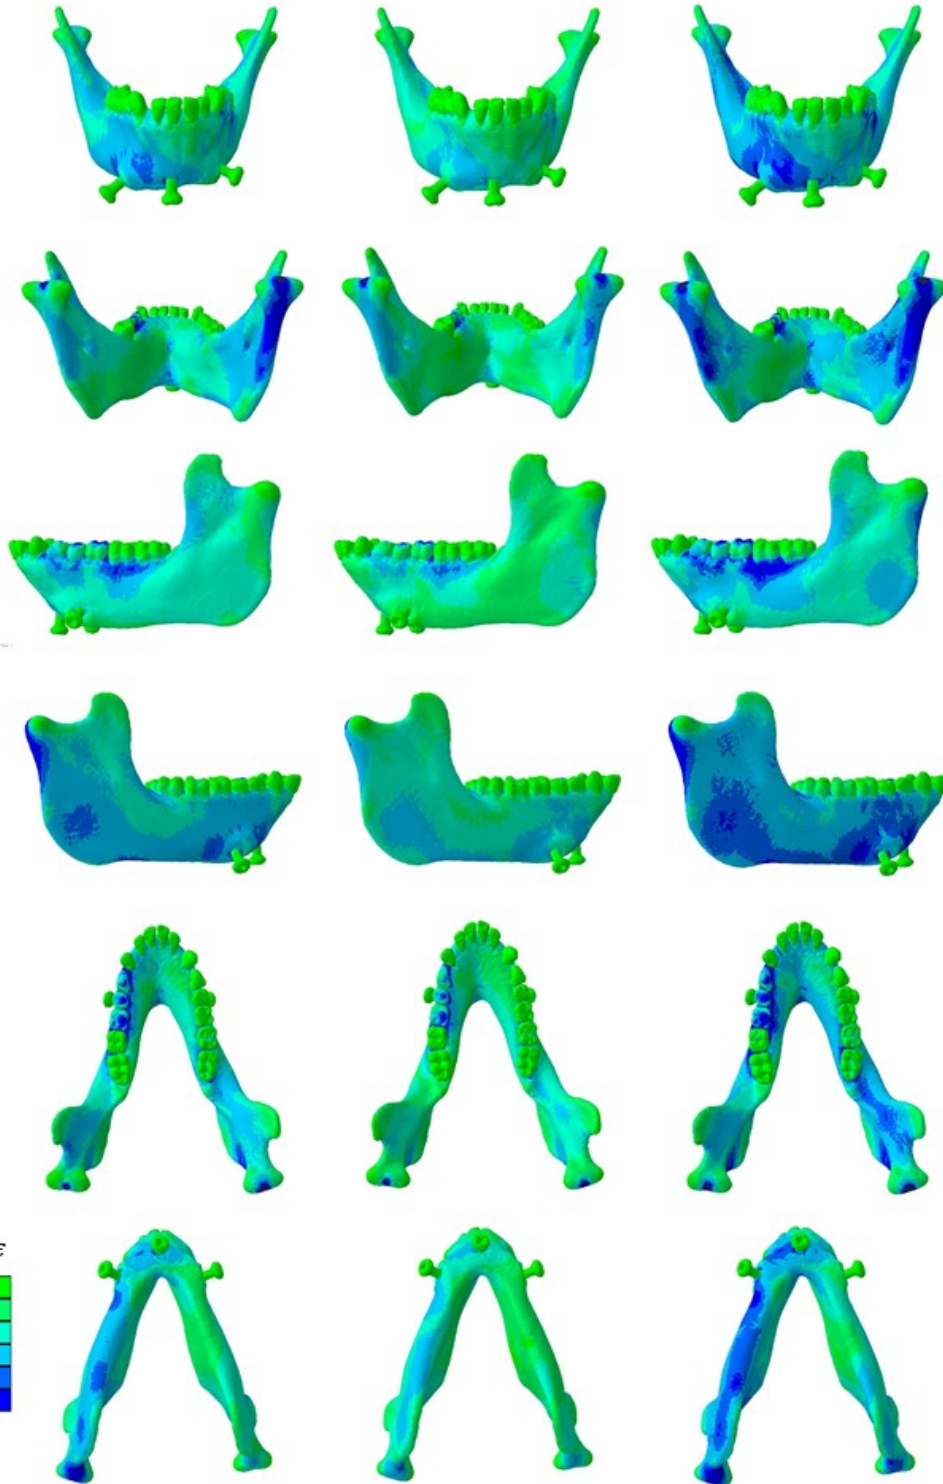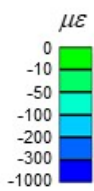

**SOM Figure S7.**  $\epsilon_2$  strain regimes in the finite element model during simulated nut chewing.

**SOM File S1.** Three animations of 1–70× deformation colored by Von Mises Stress magnitude (1), principal strain magnitude (2), and principal stress magnitude (3). (Provided separately as a PowerPoint file.)
